# Supplementary material for: First joint observations of space weather events over Mexico
Source: Copernicus journal article supplement (doi:10.5194/angeo-36-1347-2018), 2018-10-11
Supplement: Supplementary file [file angeo-36-1347-2018-supplement-title-page.pdf › angeo-36-1347-2018-supplement-title-page.pdf]

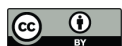

## *Supplement of*

# **First joint observations of space weather events over Mexico**

**Victor De la Luz et al.**

*Correspondence to:* Victor De la Luz ([vdelaluz@igeofisica.unam.mx](mailto:vdelaluz@igeofisica.unam.mx))

- [angeo-36-1347-2018-supplement-title-page.pdf](#)
- [tecmaps01.mp4](#)

The copyright of individual parts of the supplement might differ from the CC BY 4.0 License.
